# Supplementary material for: The duality of electron localization and covalency in lanthanide and actinide metallocenes
Source: Royal Society of Chemistry journal article supplement (doi:10.1039/c9sc06114b), 2020-01-01
Supplement: c9sc06114b1.pdf [file c9sc06114b1.pdf]

**Electronic Supplementary Information for:**

# ***The duality of electron localization and covalency in lanthanide and actinide metallocenes***

Danil E. Smiles,<sup>a</sup> Enrique R. Batista,<sup>b\*</sup> Corwin H. Booth,<sup>a</sup> David L. Clark,<sup>b</sup> Jason M. Keith,<sup>c</sup> Stosh A. Kozimor,<sup>b</sup> Richard L. Martin,<sup>b</sup> Stefan G. Minasian,<sup>a\*</sup> David K. Shuh,<sup>a</sup> S. Chantal E. Stieber,<sup>d\*</sup> Tolek Tyliszczak<sup>a</sup>

<sup>a</sup> Lawrence Berkeley National Laboratory, Berkeley, California 94720, United States.

<sup>b</sup> Los Alamos National Laboratory, Los Alamos, New Mexico 87545, United States

<sup>c</sup> Colgate University, Hamilton, New York 13346, United States.

<sup>d</sup> California State Polytechnic University, Pomona, California 91768, United States

---

**Table of Contents:**

|                  |                                                                                                                                       |           |
|------------------|---------------------------------------------------------------------------------------------------------------------------------------|-----------|
| <b>Figure S1</b> | C K-edge XAS for (C <sub>8</sub> H <sub>8</sub> ) <sub>2</sub> Ce and derivative plots.....                                           | <b>S2</b> |
| <b>Figure S2</b> | Ce M <sub>5,4</sub> -edge XAS for (C <sub>8</sub> H <sub>8</sub> ) <sub>2</sub> Ce and derivative plots .....                         | <b>S3</b> |
| <b>Figure S3</b> | Ce M <sub>5,4</sub> -edge XAS for [(C <sub>8</sub> H <sub>8</sub> ) <sub>2</sub> Ce][Li(THF) <sub>2</sub> ] and derivative plots..... | <b>S4</b> |
| <b>Table S1</b>  | Atomic coordinates for Ce(C <sub>8</sub> H <sub>8</sub> ) <sub>2</sub> used in the DFT calculation.....                               | <b>S6</b> |
| <b>Table S2</b>  | Tables of normalized C K-edge and Ce M <sub>5,4</sub> -edge XAS data.....                                                             | <b>S7</b> |

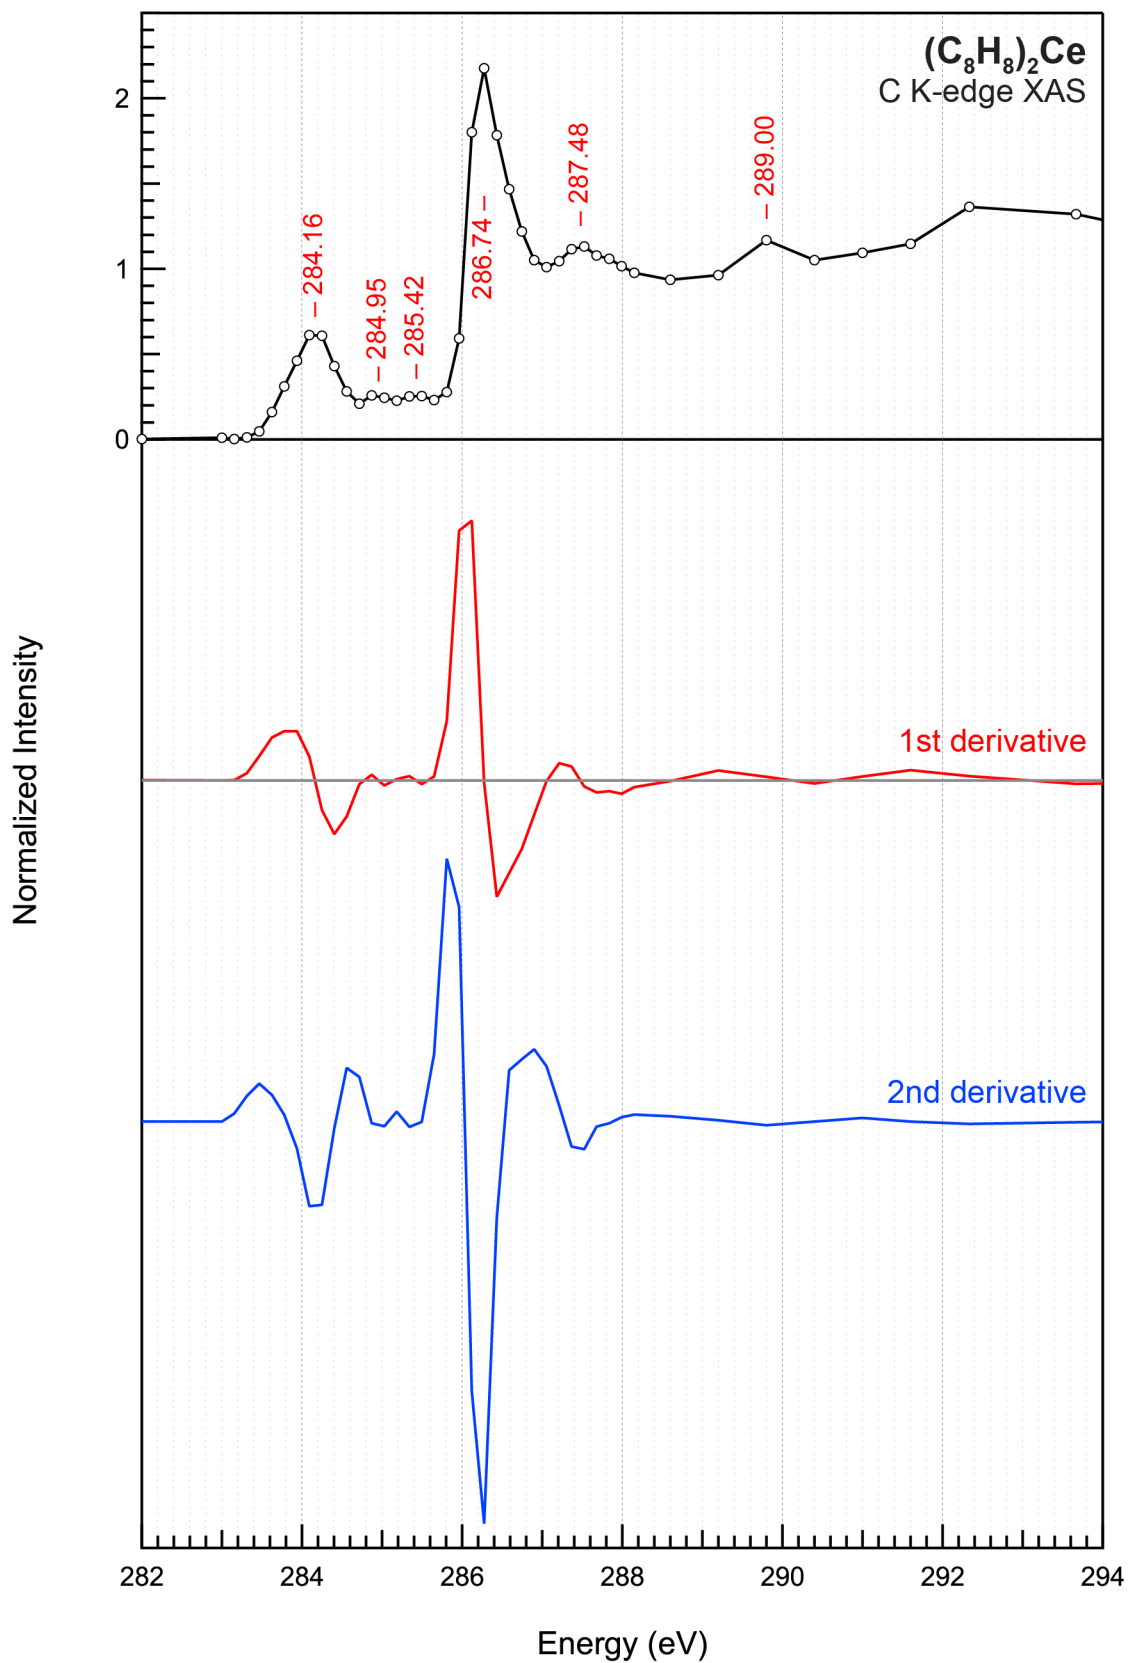

**Figure S1.** Experimental C K-edge XAS of  $(C_8H_8)_2Ce$  (black circles) with 1st and 2nd derivatives of the data (red and blue). Energies of the C K-edge XAS features are provided, and were determined using either the zero-crossing of the 1st derivative or the minimum of the 2nd derivative.

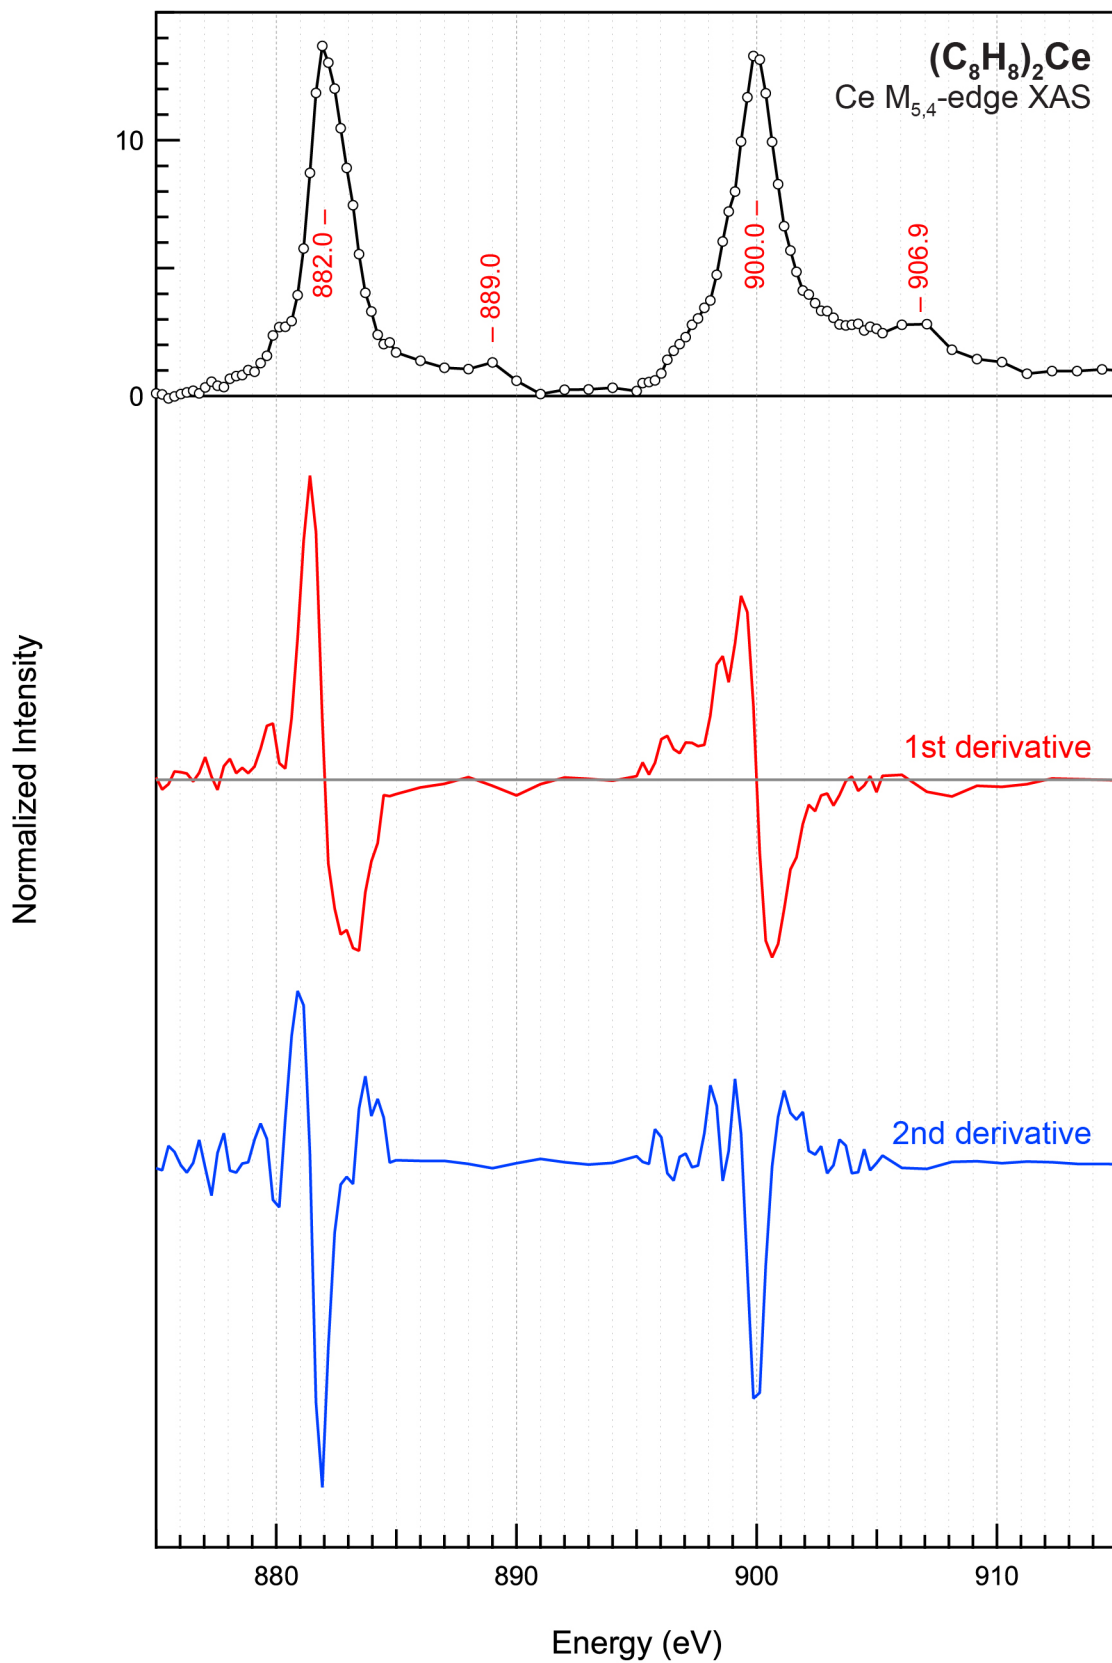

**Figure S2.** Experimental Ce M<sub>5,4</sub>-edge XAS of (C<sub>8</sub>H<sub>8</sub>)<sub>2</sub>Ce (black circles) with 1st and 2nd derivatives of the data (red and blue). Energies of the Ce M<sub>5,4</sub>-edge XAS features are provided, and were determined using either the zero-crossing of the 1st derivative or the minimum of the 2nd derivative.

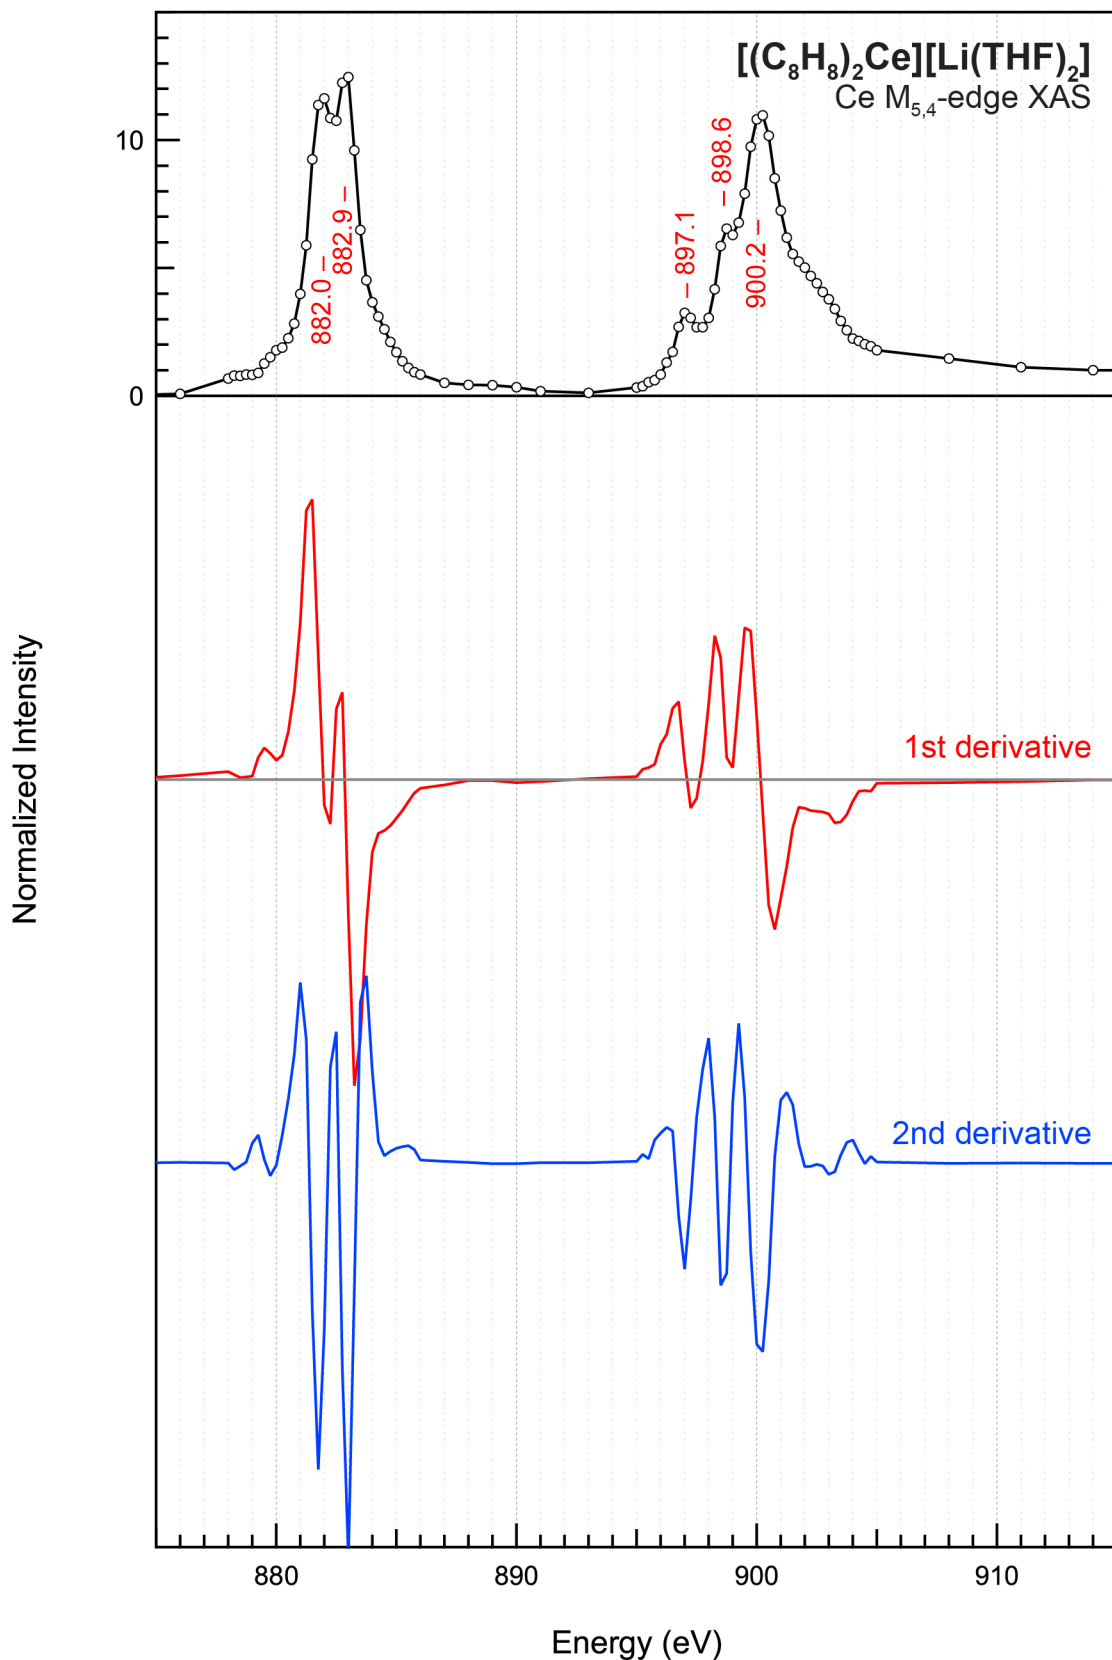

**Figure S3.** Experimental Ce M<sub>5,4</sub>-edge XAS of [(C<sub>8</sub>H<sub>8</sub>)<sub>2</sub>Ce][Li(THF)<sub>2</sub>] (black circles) with 1st and 2nd derivatives of the data (red and blue). Energies of the Ce M<sub>5,4</sub>-edge XAS features are provided, and were determined using either the zero-crossing of the 1st derivative or the minimum of the 2nd derivative.

**Table S1.** Atomic coordinates for Ce(C<sub>8</sub>H<sub>8</sub>)<sub>2</sub> used in the DFT calculations.

| #  | Atom | Coordinates (Angstroms) |           |           | Mulliken   |
|----|------|-------------------------|-----------|-----------|------------|
|    |      | x                       | y         | z         | Population |
| 1  | C    | 1.997186                | -0.687286 | -1.714694 | -0.119976  |
| 2  | C    | 1.997191                | -1.698539 | -0.726517 | -0.119989  |
| 3  | C    | 1.996915                | -1.714764 | 0.687381  | -0.119965  |
| 4  | C    | 1.99687                 | -0.726584 | 1.69863   | -0.119977  |
| 5  | C    | 1.99698                 | 1.714793  | -0.687221 | -0.11997   |
| 6  | C    | 1.997245                | 0.726613  | -1.698472 | -0.119992  |
| 7  | H    | 1.898628                | -1.090693 | -2.721225 | 0.068611   |
| 8  | H    | 1.898615                | -2.695503 | -1.153012 | 0.068624   |
| 9  | H    | 1.898173                | -2.721281 | 1.090773  | 0.068611   |
| 10 | H    | 1.898088                | -1.153066 | 2.69558   | 0.068624   |
| 11 | H    | 1.898272                | 2.721305  | -1.090637 | 0.068612   |
| 12 | H    | 1.898706                | 1.15309   | -2.695448 | 0.068624   |
| 13 | C    | 1.996911                | 1.698567  | 0.726678  | -0.11998   |
| 14 | C    | 1.996725                | 0.687314  | 1.714854  | -0.119959  |
| 15 | H    | 1.898135                | 2.695523  | 1.153148  | 0.068624   |
| 16 | H    | 1.897859                | 1.090714  | 2.721356  | 0.068611   |
| 17 | C    | -1.996853               | 1.713959  | 0.689526  | -0.119955  |
| 18 | C    | -1.997027               | 1.699455  | -0.72438  | -0.119991  |
| 19 | C    | -1.997188               | 0.689464  | -1.713862 | -0.119965  |
| 20 | C    | -1.996963               | -1.699421 | 0.724533  | -0.119985  |
| 21 | C    | -1.996819               | -0.689431 | 1.714014  | -0.11995   |
| 22 | C    | -1.996772               | 0.724474  | 1.699513  | -0.119979  |
| 23 | H    | -1.898141               | 2.719952  | 1.094214  | 0.068614   |
| 24 | H    | -1.898414               | 2.696963  | -1.149609 | 0.068616   |
| 25 | H    | -1.898712               | 1.094162  | -2.719875 | 0.068614   |
| 26 | H    | -1.898322               | -2.696936 | 1.149739  | 0.068616   |
| 27 | H    | -1.898112               | -1.094134 | 2.720002  | 0.068614   |
| 28 | H    | -1.898004               | 1.149684  | 2.697013  | 0.068616   |
| 29 | C    | -1.997226               | -0.724441 | -1.69936  | -0.119997  |
| 30 | C    | -1.997129               | -1.713926 | -0.689371 | -0.119962  |
| 31 | H    | -1.898612               | -2.719928 | -1.094085 | 0.068614   |
| 32 | H    | -1.898752               | -1.149659 | -2.696886 | 0.068616   |
| 33 | Ce   | 0.000005                | -0.000029 | -0.000148 | 0.82173    |

**Table S2.** Normalized C K-edge and Ce M<sub>5,4</sub>-edge XAS of (C<sub>8</sub>H<sub>8</sub>)<sub>2</sub>Ce, and Ce M<sub>5,4</sub>-edge XAS of [(C<sub>8</sub>H<sub>8</sub>)<sub>2</sub>Ce][Li(THF)<sub>2</sub>].

| COT2Ce_CK_Int | COT2Ce_CK_eV |
|---------------|--------------|
| -0.069757863  | 278.000      |
| -0.007396651  | 279.000      |
| -0.001929973  | 280.000      |
| -0.001908494  | 281.000      |
| 0.002172743   | 282.000      |
| 0.009336405   | 283.000      |
| 0.001884876   | 283.156      |
| 0.01101664    | 283.312      |
| 0.047124143   | 283.468      |
| 0.159997103   | 283.624      |
| 0.309962104   | 283.780      |
| 0.461123883   | 283.936      |
| 0.611399332   | 284.092      |
| 0.608278849   | 284.248      |
| 0.4300155     | 284.404      |
| 0.280427346   | 284.560      |
| 0.209715568   | 284.716      |
| 0.258514134   | 284.872      |
| 0.244174457   | 285.028      |
| 0.227476999   | 285.184      |
| 0.2527276     | 285.340      |
| 0.253587671   | 285.496      |
| 0.23040883    | 285.652      |
| 0.27754795    | 285.808      |
| 0.591545528   | 285.964      |
| 1.800656629   | 286.120      |
| 2.176731452   | 286.276      |
| 1.78417323    | 286.432      |
| 1.467337374   | 286.588      |
| 1.219404615   | 286.744      |
| 1.050176184   | 286.900      |
| 1.009350973   | 287.056      |
| 1.045268803   | 287.212      |
| 1.115233096   | 287.368      |
| 1.130845322   | 287.524      |
| 1.07897567    | 287.680      |
| 1.057929374   | 287.836      |
| 1.01469184    | 287.992      |
| 0.976448888   | 288.148      |
| 0.936166974   | 288.600      |
| 0.963578745   | 289.200      |
| 1.167703912   | 289.800      |
| 1.050117436   | 290.400      |
| 1.094208228   | 291.000      |
| 1.146813023   | 291.600      |
| 1.364052441   | 292.333      |

|             |         |
|-------------|---------|
| 1.320008376 | 293.666 |
| 1.190567428 | 294.999 |
| 1.232351729 | 296.332 |
| 1.2085334   | 300.417 |
| 1.068548867 | 305.834 |
| 0.905790274 | 311.251 |
| 0.851976783 | 316.668 |
| 0.823383415 | 322.085 |
| 0.792000895 | 327.502 |
| 0.764510549 | 332.919 |
| 0.737072356 | 338.336 |
| 0.715100675 | 343.753 |
| 0.702743979 | 349.170 |
| 0.682326591 | 354.587 |
| 0.649807569 | 360.004 |
| 0.614760838 | 365.421 |

| COT2Ce_CeM_Int | COT2Ce_CeM_Int |
|----------------|----------------|
| 0.167450213    | 860.000        |
| 0.119737903    | 861.000        |
| 0.049156385    | 862.000        |
| -0.0222325     | 863.000        |
| -0.013826954   | 864.000        |
| 0.127205566    | 865.000        |
| 0.192780638    | 866.000        |
| 0.080241607    | 867.000        |
| -0.023495491   | 868.000        |
| -0.242516287   | 869.000        |
| -0.1677228     | 870.000        |
| -0.052302674   | 871.000        |
| -0.07536352    | 872.000        |
| -0.038523284   | 873.000        |
| -0.047723933   | 874.000        |
| 0.106912845    | 875.000        |
| 0.06991798     | 875.256        |
| -0.089496594   | 875.512        |
| -0.015400488   | 875.768        |
| 0.074812721    | 876.024        |
| 0.136733167    | 876.280        |
| 0.203183713    | 876.536        |
| 0.104894069    | 876.792        |
| 0.343753633    | 877.048        |
| 0.557135751    | 877.304        |
| 0.402953941    | 877.560        |
| 0.354967711    | 877.816        |
| 0.67871254     | 878.072        |
| 0.776320025    | 878.328        |
| 0.814354494    | 878.584        |
| 1.016277578    | 878.840        |
| 0.947546424    | 879.096        |
| 1.283085333    | 879.352        |

|             |         |
|-------------|---------|
| 1.570633576 | 879.608 |
| 2.365822838 | 879.864 |
| 2.696252298 | 880.120 |
| 2.70191994  | 880.376 |
| 2.924204041 | 880.632 |
| 3.943827498 | 880.888 |
| 5.765373926 | 881.144 |
| 8.724168394 | 881.400 |
| 11.84927591 | 881.656 |
| 13.68657414 | 881.912 |
| 13.03969343 | 882.168 |
| 12.01302427 | 882.424 |
| 10.46405583 | 882.680 |
| 8.917181429 | 882.936 |
| 7.458838244 | 883.192 |
| 5.547927204 | 883.448 |
| 4.037605377 | 883.704 |
| 3.302588987 | 883.960 |
| 2.401701627 | 884.216 |
| 2.034607477 | 884.472 |
| 2.091997824 | 884.728 |
| 1.707732574 | 884.984 |
| 1.379831166 | 886.000 |
| 1.101707349 | 887.000 |
| 1.060791351 | 888.000 |
| 1.30996923  | 889.000 |
| 0.595615698 | 890.000 |
| 0.073867003 | 891.000 |
| 0.251891844 | 892.000 |
| 0.264976398 | 893.000 |
| 0.32828293  | 894.000 |
| 0.195517831 | 895.000 |
| 0.50435312  | 895.256 |
| 0.541387104 | 895.512 |
| 0.610462176 | 895.768 |
| 0.88338241  | 896.024 |
| 1.421761343 | 896.280 |
| 1.764429284 | 896.536 |
| 2.032689122 | 896.792 |
| 2.298901458 | 897.048 |
| 2.779985222 | 897.304 |
| 3.037984281 | 897.560 |
| 3.451407394 | 897.816 |
| 3.737396743 | 898.072 |
| 4.740896118 | 898.328 |
| 6.043307592 | 898.584 |
| 7.21153785  | 898.840 |
| 7.993488147 | 899.096 |
| 9.943468823 | 899.352 |
| 11.6742504  | 899.608 |
| 13.29514158 | 899.864 |



|             |         |
|-------------|---------|
| 13.15027125 | 900.120 |
| 11.83434583 | 900.376 |
| 9.92841394  | 900.632 |
| 8.28142132  | 900.888 |
| 6.644991952 | 901.144 |
| 5.686099776 | 901.400 |
| 4.854129489 | 901.656 |
| 4.12960655  | 901.912 |
| 3.965331484 | 902.168 |
| 3.631974591 | 902.424 |
| 3.335938085 | 902.680 |
| 3.3190832   | 902.936 |
| 3.064159614 | 903.192 |
| 2.805303892 | 903.448 |
| 2.758783487 | 903.704 |
| 2.780551944 | 903.960 |
| 2.82412165  | 904.216 |
| 2.558797681 | 904.472 |
| 2.71072215  | 904.728 |
| 2.630138749 | 904.984 |
| 2.463141435 | 905.240 |
| 2.789463212 | 906.042 |
| 2.812428675 | 907.084 |
| 1.804057818 | 908.126 |
| 1.44749077  | 909.168 |
| 1.328736486 | 910.210 |
| 0.866511329 | 911.252 |
| 0.975941892 | 912.294 |
| 0.977885553 | 913.336 |
| 1.041647504 | 914.378 |
| 0.972512581 | 915.420 |
| 0.970645096 | 916.462 |
| 0.717467618 | 917.504 |
| 0.51473781  | 918.546 |
| 0.802564009 | 919.588 |
| 0.807618479 | 920.630 |
| 0.956412277 | 921.672 |
| 0.770022935 | 922.714 |
| 0.865339691 | 923.756 |
| 0.870252232 | 924.798 |
| 0.791817459 | 925.840 |
| 0.928382084 | 926.882 |
| 0.946796507 | 927.924 |
| 0.964894498 | 928.966 |
| 0.909156756 | 930.008 |
| 1.049895494 | 931.050 |

|                      |                     |
|----------------------|---------------------|
| COT2Ce_anion_CeM_Int | COT2Ce_anion_CeM_eV |
| 0.004482834          | 860.000             |
| -0.003102229         | 862.000             |

|              |         |
|--------------|---------|
| 0.024636628  | 864.000 |
| -0.032400294 | 866.000 |
| 0.018490346  | 868.000 |
| -0.019212679 | 870.000 |
| -0.023394107 | 872.000 |
| 0.030499501  | 874.000 |
| 0.080640418  | 876.000 |
| 0.675045159  | 878.000 |
| 0.792643293  | 878.250 |
| 0.775304809  | 878.500 |
| 0.829217205  | 878.750 |
| 0.824618585  | 879.000 |
| 0.89305008   | 879.250 |
| 1.263095814  | 879.500 |
| 1.512316571  | 879.750 |
| 1.778215955  | 880.000 |
| 1.889987434  | 880.250 |
| 2.253989203  | 880.500 |
| 2.822168341  | 880.750 |
| 3.98276473   | 881.000 |
| 5.88520692   | 881.250 |
| 9.244991742  | 881.500 |
| 11.36208298  | 881.750 |
| 11.62815893  | 882.000 |
| 10.85805476  | 882.250 |
| 10.76047415  | 882.500 |
| 12.23670134  | 882.750 |
| 12.46622828  | 883.000 |
| 9.59976458   | 883.250 |
| 6.484955024  | 883.500 |
| 4.51872976   | 883.750 |
| 3.655725091  | 884.000 |
| 3.103217253  | 884.250 |
| 2.60782149   | 884.500 |
| 2.110225453  | 884.750 |
| 1.706670799  | 885.000 |
| 1.352839643  | 885.250 |
| 1.098469066  | 885.500 |
| 0.921216769  | 885.750 |
| 0.835438868  | 886.000 |
| 0.502242081  | 887.000 |
| 0.428922218  | 888.000 |
| 0.417155727  | 889.000 |
| 0.342871545  | 890.000 |
| 0.187774795  | 891.000 |
| 0.122640317  | 893.000 |
| 0.330462176  | 895.000 |
| 0.375709291  | 895.250 |
| 0.534365643  | 895.500 |
| 0.60861021   | 895.750 |
| 0.830667078  | 896.000 |

|             |         |
|-------------|---------|
| 1.299236236 | 896.250 |
| 1.717008922 | 896.500 |
| 2.690609101 | 896.750 |
| 3.23755966  | 897.000 |
| 3.050243142 | 897.250 |
| 2.686157618 | 897.500 |
| 2.684384043 | 897.750 |
| 3.046918961 | 898.000 |
| 4.161391067 | 898.250 |
| 5.856246819 | 898.500 |
| 6.541298589 | 898.750 |
| 6.284795646 | 899.000 |
| 6.773316681 | 899.250 |
| 7.899238365 | 899.500 |
| 9.740806281 | 899.750 |
| 10.80221373 | 900.000 |
| 10.96417049 | 900.250 |
| 10.17105851 | 900.500 |
| 8.508389703 | 900.750 |
| 7.24196054  | 901.000 |
| 6.182696775 | 901.250 |
| 5.552391559 | 901.500 |
| 5.243041271 | 901.750 |
| 5.011597016 | 902.000 |
| 4.683734538 | 902.250 |
| 4.403531103 | 902.500 |
| 4.068035572 | 902.750 |
| 3.77290558  | 903.000 |
| 3.39900031  | 903.250 |
| 2.92799772  | 903.500 |
| 2.569453629 | 903.750 |
| 2.24528544  | 904.000 |
| 2.149022277 | 904.250 |
| 2.017772026 | 904.500 |
| 1.935634086 | 904.750 |
| 1.786754471 | 905.000 |
| 1.457500975 | 908.000 |
| 1.121415761 | 911.000 |
| 0.997616338 | 914.000 |
| 1.026179167 | 917.000 |
| 0.964055354 | 920.000 |
| 0.953488601 | 923.000 |
| 1.011402012 | 926.000 |
| 1.037764566 | 929.000 |
| 1.07488402  | 932.000 |
| 1.029751219 | 935.000 |
| 0.98107353  | 938.000 |
| 0.98456409  | 941.000 |
| 0.948748502 | 944.000 |
| 0.958473174 | 947.000 |
| 0.96305029  | 950.000 |

|             |         |
|-------------|---------|
| 1.030443898 | 953.000 |
| 1.005575358 | 956.000 |
| 1.016223602 | 959.000 |
| 1.00734101  | 962.000 |
| 1.001419283 | 965.000 |
| 0.954941869 | 968.000 |
